# Supplementary material for: Basal Diet Fed to Recipient Mice Was the Driving Factor for Colitis and Colon Tumorigenesis, despite Fecal Microbiota Transfer from Mice with Severe or Mild Disease
Source: MDPI journal article supplement (doi:10.3390/nu15061338), 2023-03-09
Supplement: s1 [file s1]

Supplementary Material

# Basal diet fed to recipient mice was the driving factor for colitis and colon tumorigenesis, despite fecal microbiota transfer from mice with severe or mild disease

Daphne M. Rodriguez, Korry J. Hintze, Giovanni Rompato, Eliza C. Stewart, Abbey H. Barton, Emily Mortensen-Curtis, Porter A. Green, Arnaud J. Van Wette, Aaron J. Thomas, Abby D. Benninghoff \*

\* Correspondence: abby.benninghoff@usu.edu; Tel.: +01-435-797-8649

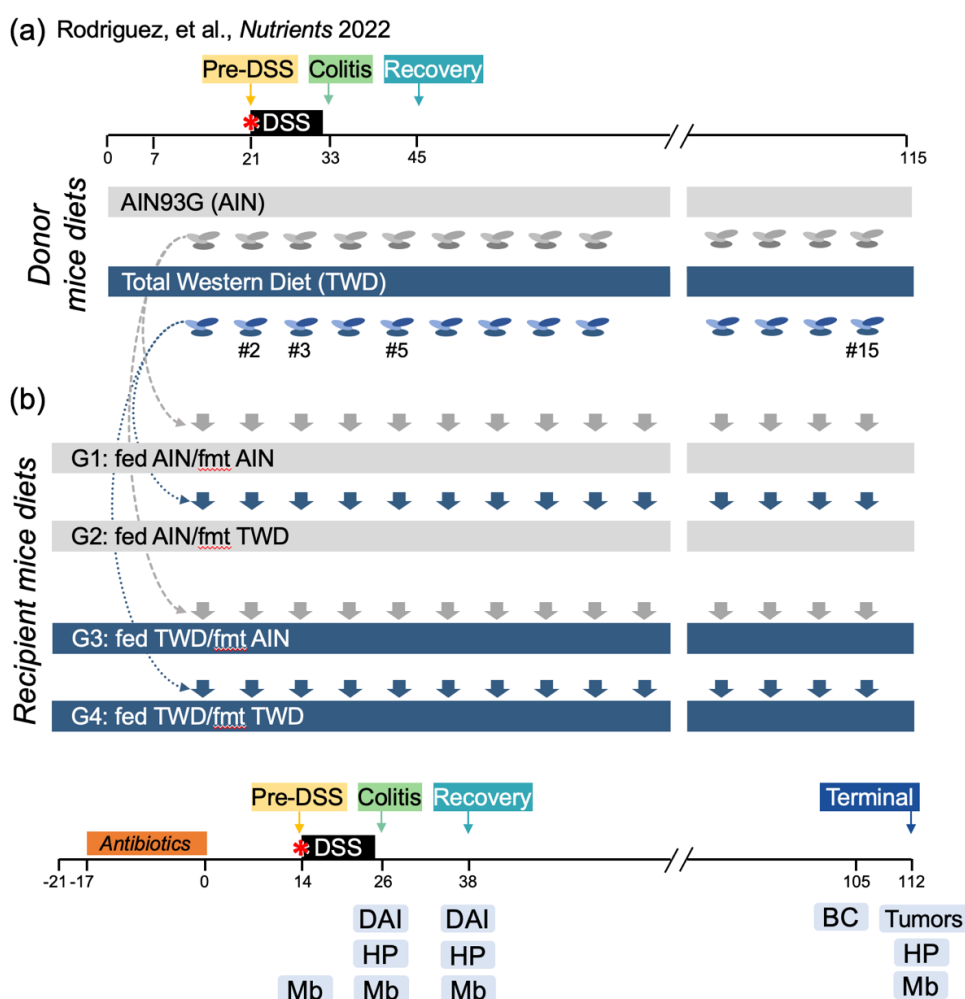

**Figure S1.** Experimental design. (a) Diagram outlines the experimental design for the treatment of donor mice with azoxymethane (red asterisk) and dextran sodium sulfate (DSS) to induce colitis and colon tumorigenesis. Also shown are the time points for weekly collection of fecal samples for each basal diet group. Full experimental details are outlined in Rodriguez, et al. [22]. (b) Diagram outlines the experiment design for this study, described in detail in the Materials and Methods. Basal diets are represented as gray (AIN) or blue (TWD) bars with FMT from AIN-fed donors (grey arrows) and FMT from TWD-fed donor mice (blue arrows). Numbers below each FMT donor represents the week of collection that was then to time-matched for recipient mice. For example, collection 3 occurred while the donor mice were experience active colitis and was used to inoculate recipient mice just prior to DSS treatment. In this study, the endpoints assessed are shown, including the disease activity index (DAI), histopathology (HP), fecal microbiome profile (Mb), body composition (BC) and colon tumor incidence, multiplicity and burden (tumors).

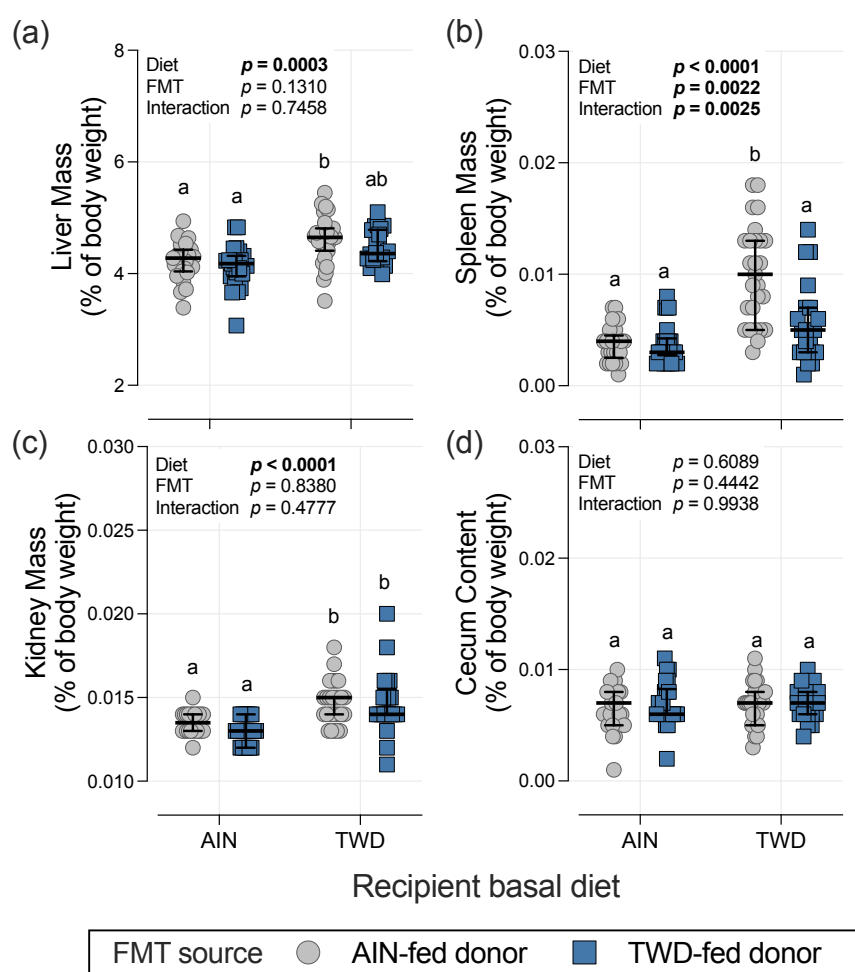

**Figure S2.** Relative liver, kidney, spleen, and cecum content weights. Data for liver (a), kidney (b), spleen (c), and cecum content (d) weights are shown as a proportion of the final body weight. Values for individual mice are shown with median  $\pm$  interquartile range. Inset tables provide the model main effects for diet, treatment, and their interaction, and different letters indicate groups are significantly different ( $p < 0.05$ ) as outlined in Materials and Methods.

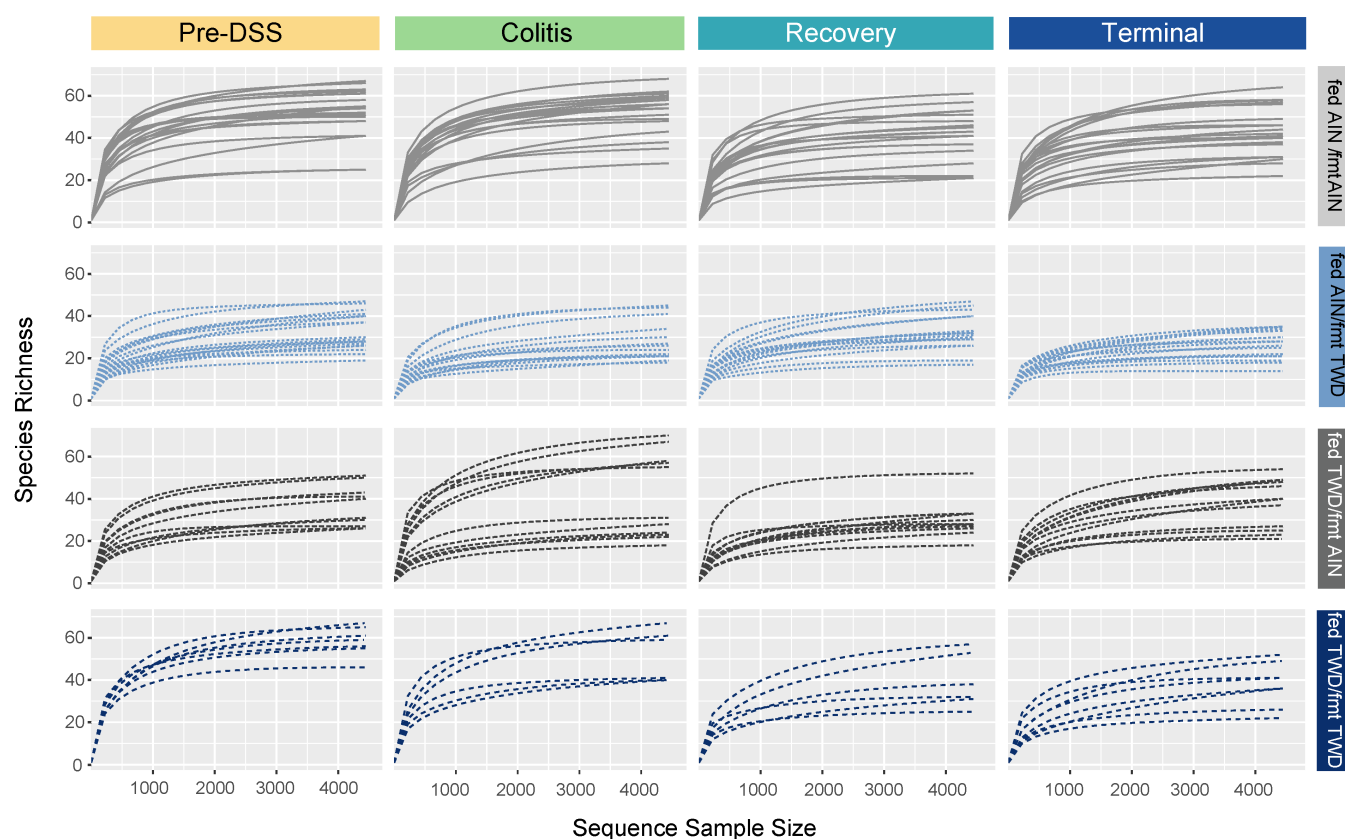

**Figure S3.** Rarefaction curve analysis by experimental group and time point. Rarefaction curve analysis by experimental group and time point. Curves plot species richness as a function of sequence sample size. For comparisons across experimental groups, data were rarefied to ~4,400 sequences, the lowest total among all the samples. These curves indicate that saturation was reached satisfactorily for most samples and that additional sequence reads were unlikely to substantially increase the number of species detected.

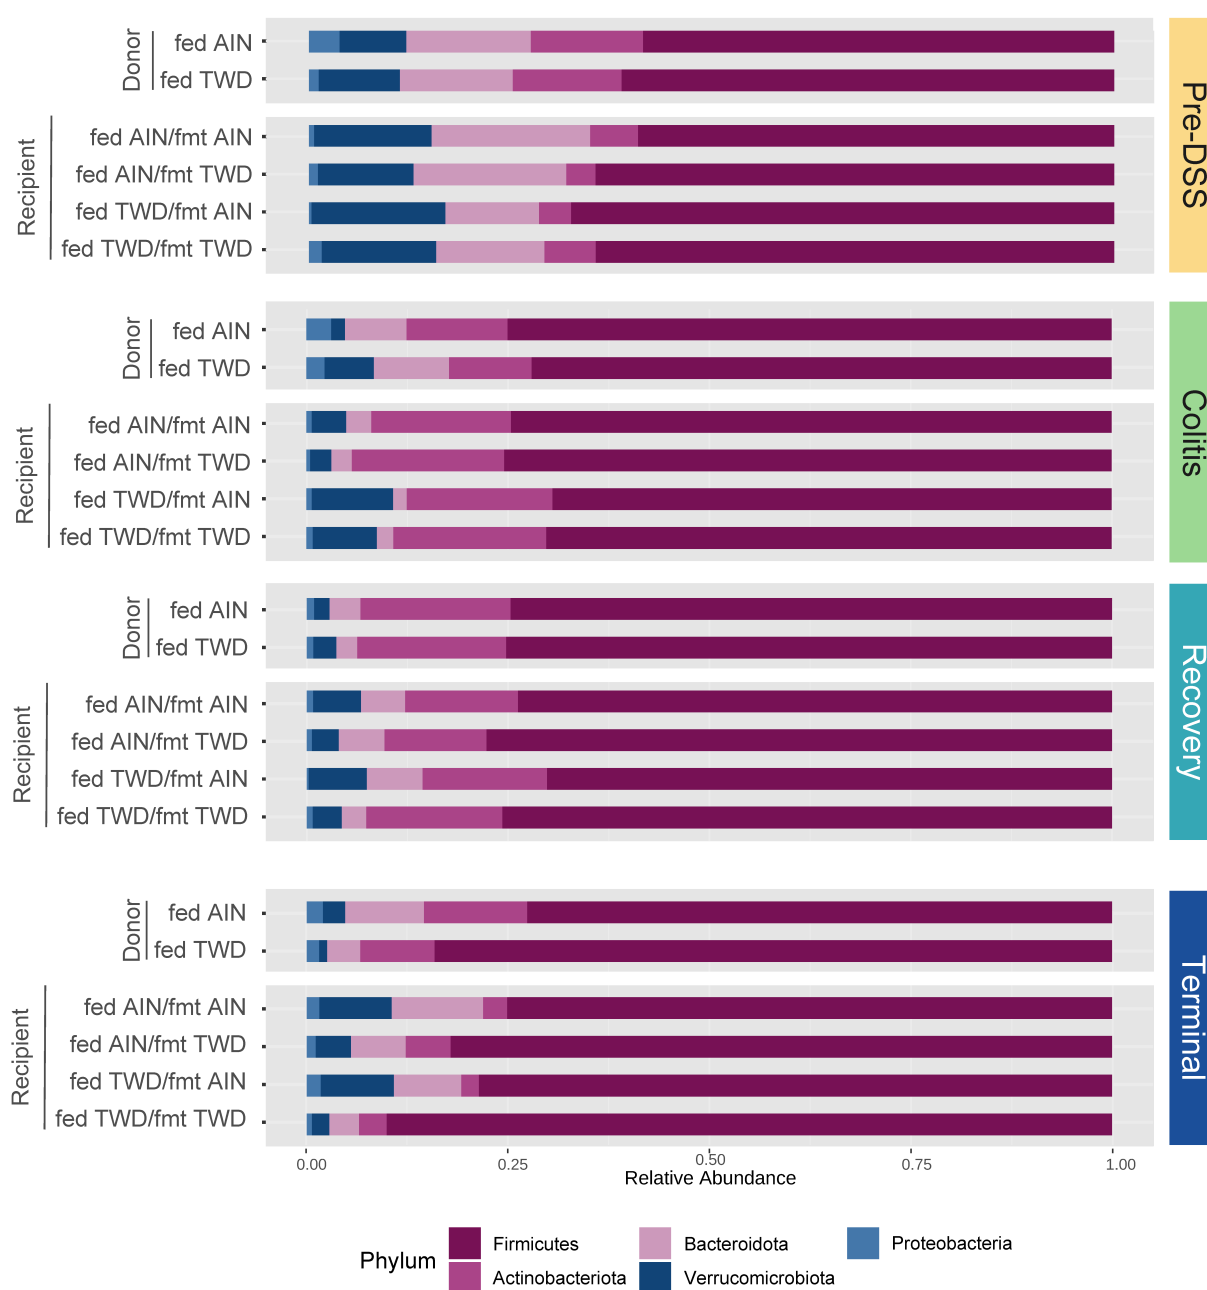

**Figure S4.** Taxonomic classification of mouse fecal bacteria at the phylum level. Data shown are the relative normalized abundance of bacteria annotated to the phylum level.

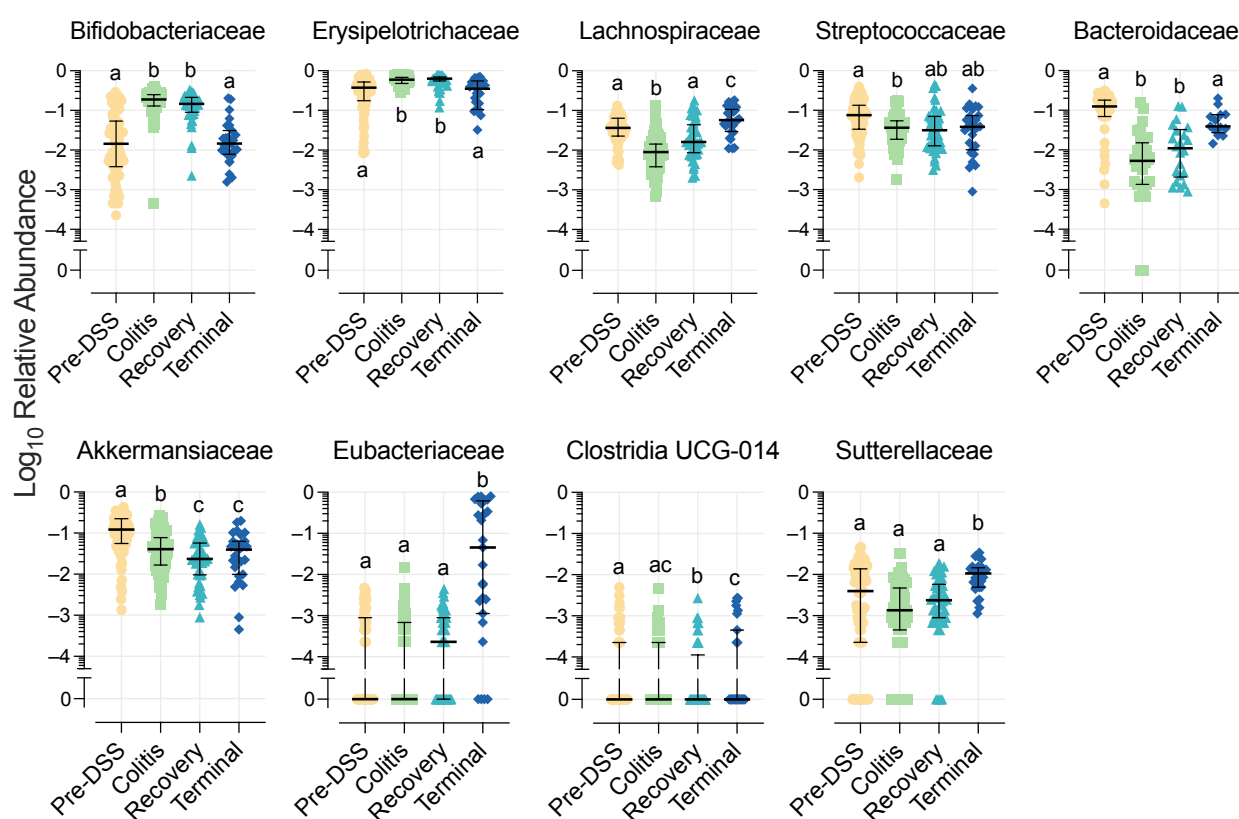

**Figure S5.** Relative abundance of selected bacteria families of interest over the study time points. The  $\log_{10}$  relative abundance values for representing each cage (as the biological unit) with the median  $\pm$  interquartile range are shown for selected taxa, irrespective of basal diet or FMT donor source, for each experimental time point. Different letters indicate that relative abundances for time points are significantly different ( $p < 0.05$ ) as determined by statistical methods outlined in Materials and Methods.

**Table S1. Experimental diet formulations**

|                         |                           | AIN93G | TWD   |
|-------------------------|---------------------------|--------|-------|
| Energy density (kcal/g) |                           | 3.76   | 4.35  |
| Macronutrients          | Carbohydrates (g/kg diet) |        |       |
|                         | Corn Starch               | 397.5  | 230   |
|                         | Maltodextrin              | 132    | 70    |
|                         | Sucrose                   | 100    | 261.2 |
|                         | Cellulose                 | 50     | 30    |
|                         | Kcal (% of total)         | 63.9%  | 50.0% |
|                         | Proteins (g/kg)           |        |       |
|                         | Casein                    | 200    | 190   |
|                         | L-cystine                 | 3      | 2.85  |
|                         | Kcal (% of total)         | 18.8%  | 15.5% |
|                         | Fats (g/kg)               |        |       |
|                         | Soybean oil               | 70     | 31.4  |
|                         | Anhydrous milk fat        |        | 36.3  |
|                         | Olive Oil                 |        | 28    |
|                         | Lard                      |        | 28    |
|                         | Beef tallow               |        | 24.8  |
|                         | Corn oil                  |        | 16.5  |
|                         | Cholesterol               |        | 0.4   |
|                         | Kcal (% of total)         | 17.2%  | 34.5% |
| Micronutrients          | Minerals (mg/kg)          |        |       |
|                         | Calcium                   | 5000   | 2011  |
|                         | Phosphorus                | 3000   | 2757  |
|                         | Sodium                    | 1019   | 7078  |
|                         | Potassium                 | 3600   | 5333  |
|                         | Magnesium                 | 507    | 589   |
|                         | Iron                      | 35     | 31    |
|                         | Zinc                      | 30     | 25    |
|                         | Copper                    | 6      | 2.6   |
|                         | Selenium                  | 0.15   | 0.2   |
|                         | Vitamins (unit/kg)        |        |       |
|                         | Thiamin (mg)              | 5      | 3.5   |
|                         | Riboflavin (mg)           | 6      | 4.4   |
|                         | Niacin (mg)               | 30     | 50.6  |
|                         | Pyridoxine (mg)           | 6      | 3.9   |
|                         | Folate (mg)               | 2      | 1.3   |
|                         | Vitamin B12 (µg)          | 25     | 11    |
|                         | Vitamin A (IU)            | 4000   | 4300  |
|                         | Vitamin D (IU)            | 1000   | 391   |
|                         | Vitamin E (IU)            | 75     | 24.6  |
|                         | Vitamin K (µg)            | 750    | 189   |
|                         | Choline (mg)              | 1027   | 648   |

Note: TWD, total Western diet. Composition of the TWD was published previously.<sup>1</sup> No data are available in NHANES for chloride, manganese, iodine, pantothenic acid, biotin, or ultra-trace minerals.

<sup>1</sup> Hintze, K.J.; Benninghoff, A.D.; Ward, R.E. Formulation of the total western diet (TWD) as a basal diet for rodent cancer studies. *J. Agric. Food Chem.* 2012, 60, 6736-6742, doi:10.1021/jf204509a.

**Table S2.** Alpha diversity pairwise comparisons for effects of time point only, irrespective of basal diet or FMT source

| Time point comparison | Alpha Diversity Measure |               |               |
|-----------------------|-------------------------|---------------|---------------|
|                       | Observed ASVs           | Chao1 index   | Shannon Index |
| Pre-DSS vs. Colitis   | <b>0.0001</b>           | <b>0.0001</b> | <b>0.0001</b> |
| Pre-DSS vs. Recovery  | <b>0.0001</b>           | <b>0.0001</b> | <b>0.0001</b> |
| Pre-DSS vs. Terminal  | 0.7358                  | 0.7080        | 0.1370        |
| Colitis vs. Recovery  | <b>0.0235</b>           | <b>0.0444</b> | 0.9776        |
| Colitis vs. Terminal  | <b>0.0001</b>           | <b>0.0001</b> | <b>0.0001</b> |
| Recovery vs. Terminal | <b>0.0001</b>           | <b>0.0001</b> | <b>0.0005</b> |

Values shown are the Tukey HSD post-hoc comparison *p*-values for each pairwise comparison between experimental diet groups within each timepoint following a generalized linear model analysis. Main effects of all experimental factors are presented in Figure 10.

**Table S3.** Alpha diversity pairwise comparisons by experimental group within time points

| Timepoint | Comparison                          | Alpha Diversity Measure |               |                  |
|-----------|-------------------------------------|-------------------------|---------------|------------------|
|           |                                     | Observed<br>ASVs        | Chao1 index   | Shannon<br>Index |
| Pre-DSS   | fed AIN/fmt AIN vs. fed AIN/fmt TWD | 0.9999                  | 0.9646        | 0.9298           |
| Pre-DSS   | fed AIN/fmt AIN vs. fed TWD/fmt AIN | 0.0971                  | 0.1128        | 0.0876           |
| Pre-DSS   | fed AIN/fmt AIN vs. fed TWD/fmt TWD | 0.1385                  | 0.1578        | 0.2483           |
| Pre-DSS   | fed AIN/fmt TWD vs. fed TWD/fmt AIN | 0.1026                  | <b>0.0470</b> | 0.3331           |
| Pre-DSS   | fed AIN/fmt TWD vs. fed TWD/fmt TWD | 0.1450                  | 0.0669        | 0.6455           |
| Pre-DSS   | fed TWD/fmt AIN vs. fed TWD/fmt TWD | 0.9945                  | 0.9950        | 0.9324           |
| Colitis   | fed AIN/fmt AIN vs. fed AIN/fmt TWD | 0.2367                  | 0.3275        | 0.1366           |
| Colitis   | fed AIN/fmt AIN vs. fed TWD/fmt AIN | 0.7934                  | 0.6447        | 0.6840           |
| Colitis   | fed AIN/fmt AIN vs. fed TWD/fmt TWD | 0.7091                  | 0.6474        | 0.8974           |
| Colitis   | fed AIN/fmt TWD vs. fed TWD/fmt AIN | 0.7558                  | 0.9430        | <b>0.0121</b>    |
| Colitis   | fed AIN/fmt TWD vs. fed TWD/fmt TWD | 0.8159                  | 0.9344        | <b>0.0320</b>    |
| Colitis   | fed TWD/fmt AIN vs. fed TWD/fmt TWD | 0.9992                  | 0.9999        | 0.9752           |
| Recovery  | fed AIN/fmt AIN vs. fed AIN/fmt TWD | 0.8925                  | 0.9361        | 0.9176           |
| Recovery  | fed AIN/fmt AIN vs. fed TWD/fmt AIN | 0.4851                  | 0.4855        | 0.6247           |
| Recovery  | fed AIN/fmt AIN vs. fed TWD/fmt TWD | 0.9771                  | 0.9831        | 0.6889           |
| Recovery  | fed AIN/fmt TWD vs. fed TWD/fmt AIN | 0.1407                  | 0.1802        | 0.2450           |
| Recovery  | fed AIN/fmt TWD vs. fed TWD/fmt TWD | 0.9862                  | 0.9945        | 0.2792           |
| Recovery  | fed TWD/fmt AIN vs. fed TWD/fmt TWD | 0.2247                  | 0.2418        | 0.9986           |
| Terminal  | fed AIN/fmt AIN vs. fed AIN/fmt TWD | 0.8964                  | 0.9356        | 0.6431           |
| Terminal  | fed AIN/fmt AIN vs. fed TWD/fmt AIN | 0.0916                  | 0.3458        | 0.1600           |
| Terminal  | fed AIN/fmt AIN vs. fed TWD/fmt TWD | <b>0.0248</b>           | 0.0841        | <b>0.0023</b>    |
| Terminal  | fed AIN/fmt TWD vs. fed TWD/fmt AIN | 0.4012                  | 0.7522        | 0.8278           |
| Terminal  | fed AIN/fmt TWD vs. fed TWD/fmt TWD | 0.1969                  | 0.3678        | 0.0944           |
| Terminal  | fed TWD/fmt AIN vs. fed TWD/fmt TWD | 0.9855                  | 0.9284        | 0.3889           |

Values shown are the Tukey HSD post-hoc comparison *p*-values for each pairwise comparison between experimental diet groups within each timepoint following a generalized linear model analysis.



**Table S4.** Alpha diversity pairwise comparisons by time point within experimental group

| Diet/Treatment  | Comparison            | Alpha Diversity Measure |               |               |
|-----------------|-----------------------|-------------------------|---------------|---------------|
|                 |                       | Observed ASVs           | Chao1 index   | Shannon index |
| fed AIN/fmt AIN | Pre-DSS vs. Colitis   | <b>0.0001</b>           | <b>0.0001</b> | <b>0.0001</b> |
| fed AIN/fmt AIN | Pre-DSS vs. Recovery  | <b>0.0001</b>           | <b>0.0001</b> | <b>0.0003</b> |
| fed AIN/fmt AIN | Pre-DSS vs. Terminal  | 0.9860                  | 0.9989        | 0.9961        |
| fed AIN/fmt AIN | Colitis vs. Recovery  | 0.6488                  | 0.7368        | 0.9490        |
| fed AIN/fmt AIN | Colitis vs. Terminal  | <b>0.0001</b>           | <b>0.0001</b> | <b>0.0002</b> |
| fed AIN/fmt AIN | Recovery vs. Terminal | <b>0.0003</b>           | <b>0.0012</b> | <b>0.0031</b> |
| fed AIN/fmt TWD | Pre-DSS vs. Colitis   | <b>0.0001</b>           | <b>0.0001</b> | <b>0.0001</b> |
| fed AIN/fmt TWD | Pre-DSS vs. Recovery  | <b>0.0003</b>           | <b>0.0001</b> | <b>0.0207</b> |
| fed AIN/fmt TWD | Pre-DSS vs. Terminal  | 0.9547                  | 0.7479        | 0.9239        |
| fed AIN/fmt TWD | Colitis vs. Recovery  | 0.1196                  | 0.1449        | 0.0986        |
| fed AIN/fmt TWD | Colitis vs. Terminal  | <b>0.0002</b>           | <b>0.0003</b> | <b>0.0063</b> |
| fed AIN/fmt TWD | Recovery vs. Terminal | <b>0.0415</b>           | <b>0.0413</b> | 0.3971        |
| fed TWD/fmt AIN | Pre-DSS vs. Colitis   | <b>0.0001</b>           | <b>0.0001</b> | <b>0.0263</b> |
| fed TWD/fmt AIN | Pre-DSS vs. Recovery  | <b>0.0003</b>           | <b>0.0013</b> | <b>0.0004</b> |
| fed TWD/fmt AIN | Pre-DSS vs. Terminal  | 0.9728                  | 0.9999        | 0.9635        |
| fed TWD/fmt AIN | Colitis vs. Recovery  | 0.9896                  | 0.9914        | 0.3445        |
| fed TWD/fmt AIN | Colitis vs. Terminal  | <b>0.0085</b>           | <b>0.0067</b> | 0.3866        |
| fed TWD/fmt AIN | Recovery vs. Terminal | <b>0.0268</b>           | <b>0.0211</b> | <b>0.0349</b> |
| fed TWD/fmt TWD | Pre-DSS vs. Colitis   | <b>0.0001</b>           | <b>0.0001</b> | <b>0.0019</b> |
| fed TWD/fmt TWD | Pre-DSS vs. Recovery  | <b>0.0118</b>           | <b>0.0146</b> | <b>0.0001</b> |
| fed TWD/fmt TWD | Pre-DSS vs. Terminal  | 0.5775                  | 0.6378        | <b>0.0081</b> |
| fed TWD/fmt TWD | Colitis vs. Recovery  | 0.1399                  | 0.1632        | 0.6640        |
| fed TWD/fmt TWD | Colitis vs. Terminal  | <b>0.0060</b>           | <b>0.0067</b> | 0.9968        |
| fed TWD/fmt TWD | Recovery vs. Terminal | 0.4997                  | 0.4828        | 0.8651        |

Values shown are the Tukey HSD post-hoc comparison *p*-values for each pairwise comparison across time points within each experimental diet group following a generalized linear model analysis.
